# Supplementary material for: Fabrication of conductive oxidase-entrapping nanocomposite of mesoporous ceria–carbon for efficient electrochemical biosensor
Source: Royal Society of Chemistry journal article supplement (doi:10.1039/c5ra17808h), 2015-01-01
Supplement: c5ra17808h1.pdf [file c5ra17808h1.pdf]

## Electronic Supplementary Information (ESI)

# Fabrication of conductive oxidase–entrapping nanocomposite in mesoporous ceria–carbon for efficient electrochemical biosensor

*Eunae Kang,<sup>a</sup> Jinwoo Lee,<sup>b</sup> Byoung Yeon Won,<sup>b</sup> Seongbeen Kim,<sup>a</sup> Sujeong Shin,<sup>b</sup> Moon Il  
Kim <sup>\*c</sup> and Hyun Gyu Park<sup>\*b</sup>*

<sup>a</sup> Department of Chemical Engineering, POSTECH, San 31, Hyoja-dong, Nam-gu, Pohang,  
Gyungbuk 790-784, Republic of Korea.

<sup>b</sup> Department of Chemical and Biomolecular Engineering (BK 21+ Program), KAIST, 291  
Daehak-ro, Yuseong-gu, Daejeon 305-701, Republic of Korea.

<sup>c</sup> Department of BioNano Technology, Gachon University, 1342 Seongnamdae-ro, Sujeong-  
gu, Seongnam, Gyeonggi 461-701, Republic of Korea.

\*To whom correspondence should be addressed. E-mail: [moonil@gachon.ac.kr](mailto:moonil@gachon.ac.kr);  
[hgpark@kaist.ac.kr](mailto:hgpark@kaist.ac.kr)

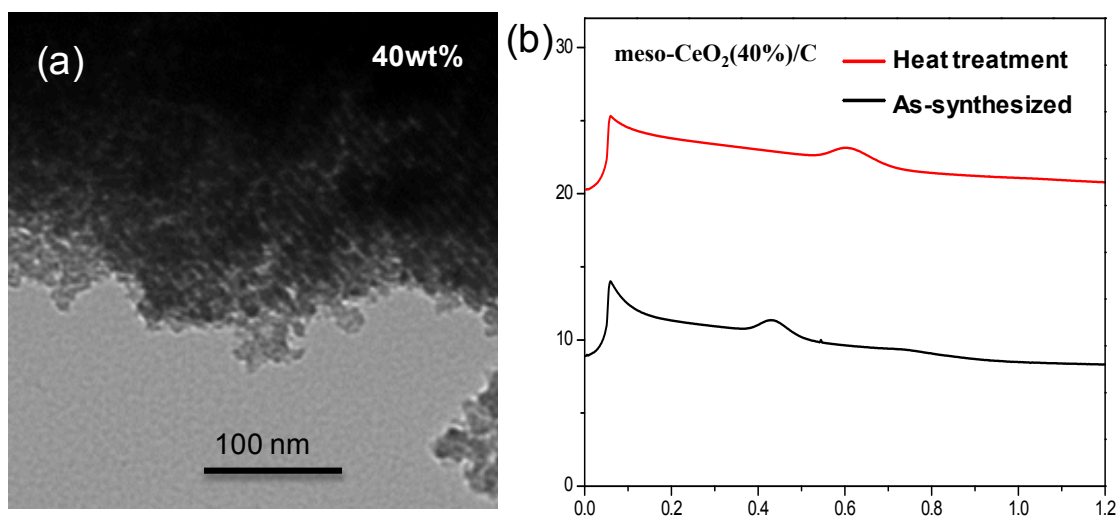

**Figure S1.** (a) TEM image and (b) SAXS trace of Meso-CeO<sub>2</sub> (40%)/C.

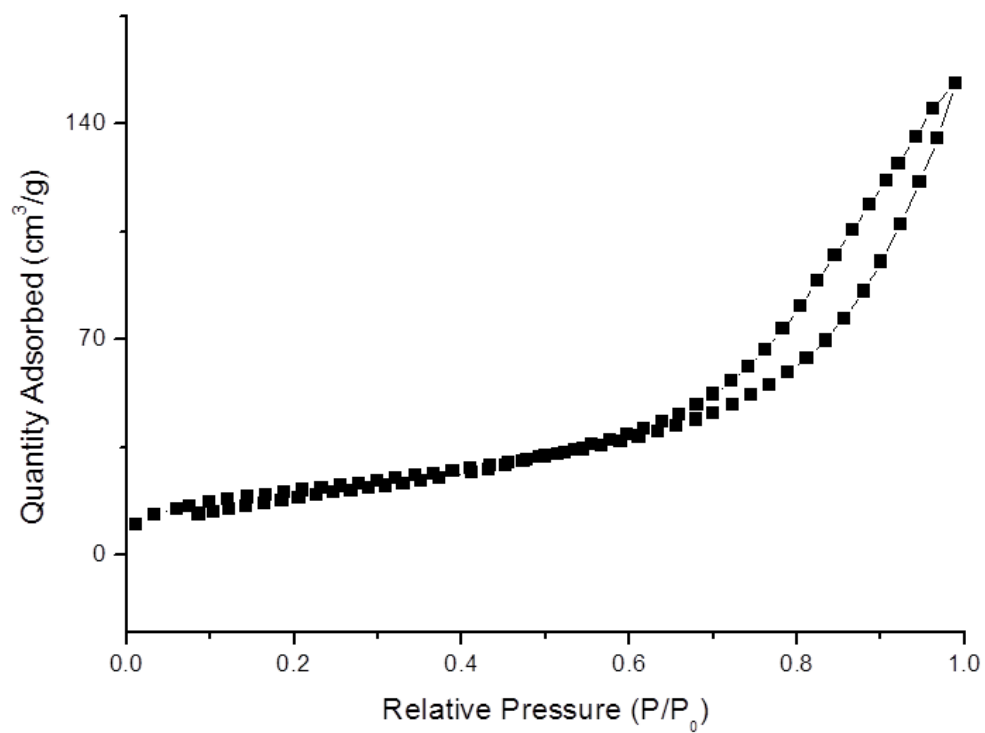

**Figure S2.** Nitrogen adsorption/desorption isotherms of the nanocomposite entrapping GOx in Meso-CeO<sub>2</sub> (60%)/C.

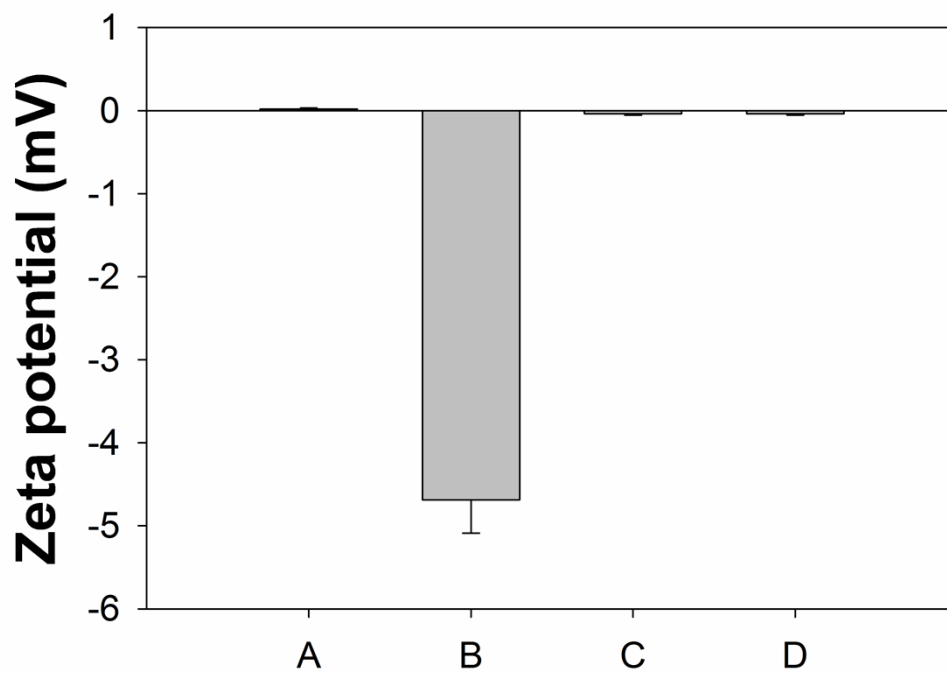

**Figure S3.** Zeta potential measurements at pH 7. A: Meso-CeO<sub>2</sub> (60%)/C, B: Meso-CeO<sub>2</sub> (60%)/C after the immobilization of GOx, C: Meso-CeO<sub>2</sub> (20%)/C, D: Meso-CeO<sub>2</sub> (20%)/C after the immobilization of GOx

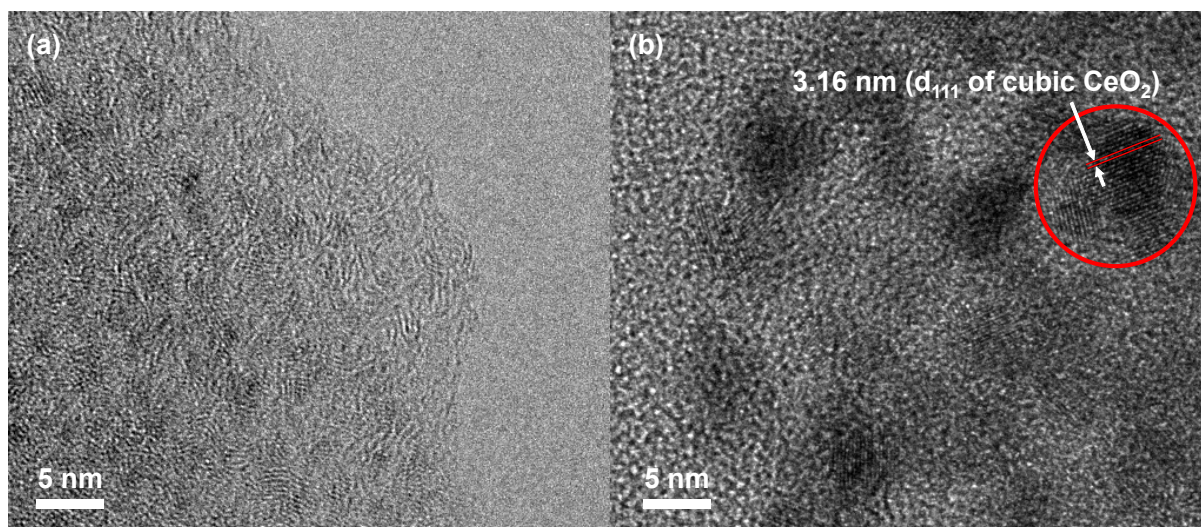

**Figure S4.** High resolution TEM images of (a) Meso-CeO<sub>2</sub> (20%)/C and (b) Meso-CeO<sub>2</sub> (60%)/C.  $d_{111}$  spacing of cubic CeO<sub>2</sub> nanocrystals is shown in the image.

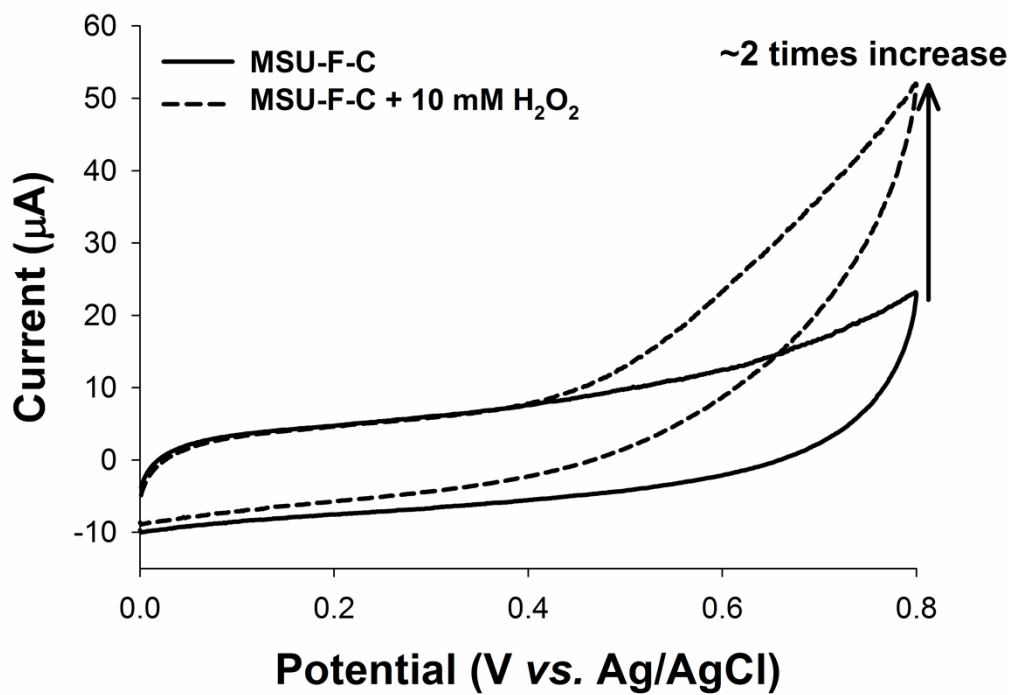

**Figure S5.** Cyclic voltammetry to determine the effect of H<sub>2</sub>O<sub>2</sub> on the current signal. MSU-F-C without CeO<sub>2</sub> was employed in this experiment.

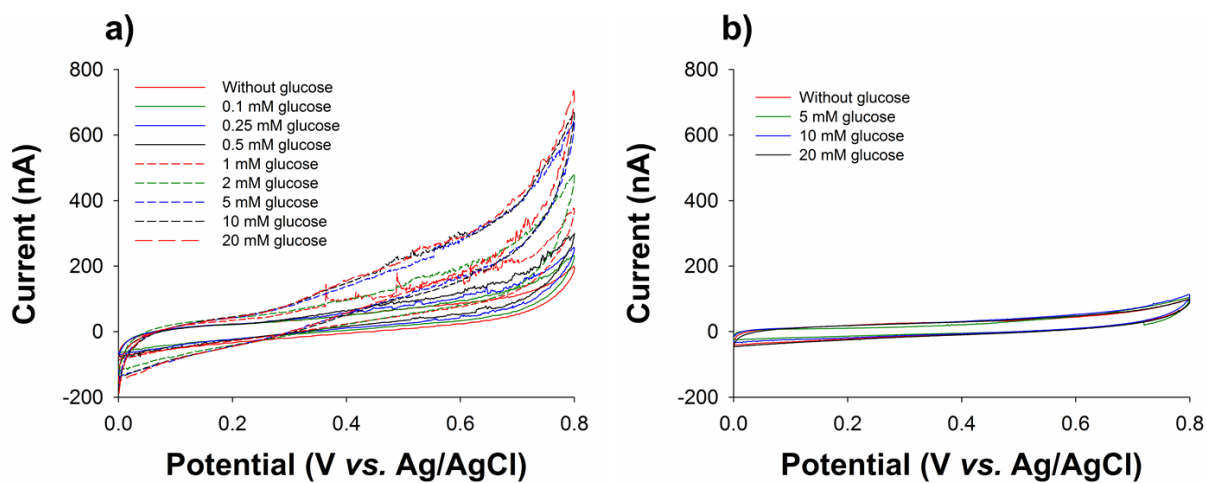

**Figure S6.** Cyclic voltammetry to determine the effect of glucose level on the current signal.

a) nanocomposite after the immobilization of GOx in Meso-CeO<sub>2</sub> (60%)/C, b) nanocomposite after the immobilization of GOx in Meso-CeO<sub>2</sub> (20%)/C.

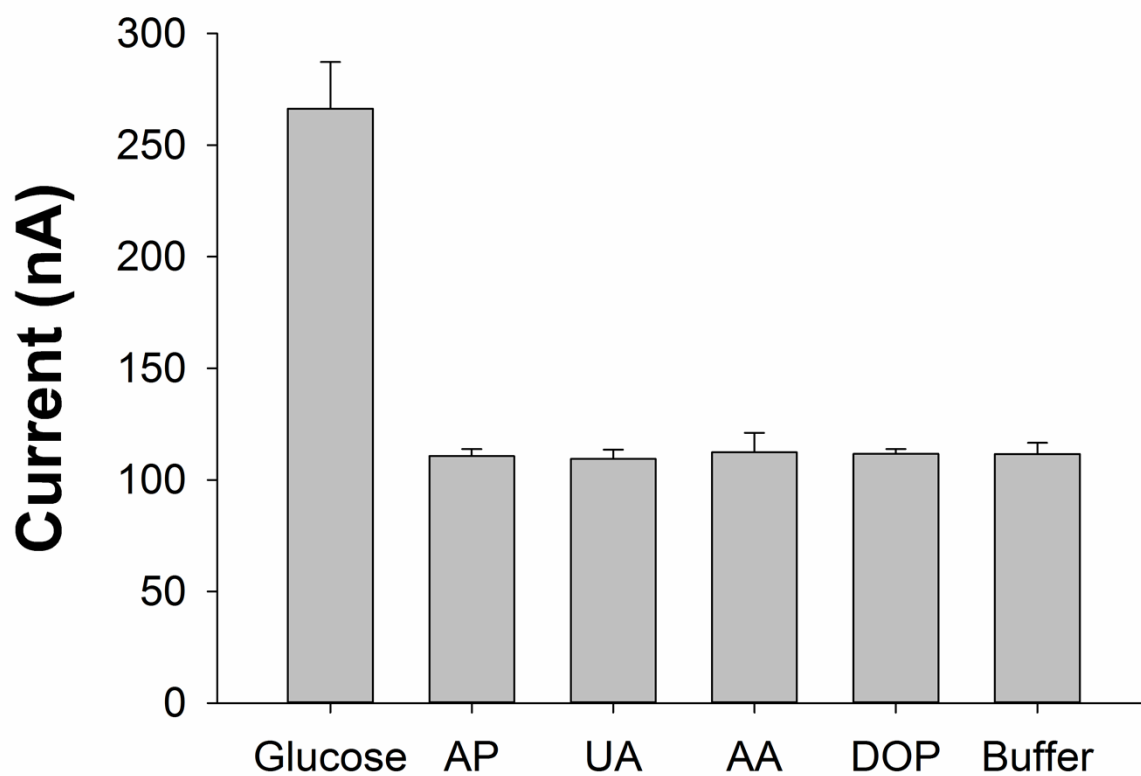

**Figure S7.** Current responses towards various potential interfering substances in serum. The concentrations of glucose, acetaminophen (AP), uric acid (UA), ascorbic acid (AA), and dopamine (DOP) were 1 mM, 100  $\mu$ M, 20  $\mu$ M, 50  $\mu$ M, and 3 nM, respectively.



**Table S1.** Comparison of the performances of the various CeO<sub>2</sub>-based electrochemical biosensors for H<sub>2</sub>O<sub>2</sub> and glucose sensing with the present system.

| Biosensor design                        | LOD (μM) | Linear range (mM) | Sensitivity (μA/mM) | Shelf life | Detection condition     | Ref        |
|-----------------------------------------|----------|-------------------|---------------------|------------|-------------------------|------------|
| H <sub>2</sub> O <sub>2</sub> detection |          |                   |                     |            |                         |            |
| CeO <sub>2</sub>                        | 0.098    | 0.0022-0.32       | 240                 | NR         | Buffer                  | 17         |
| CeO <sub>2</sub> /platinum/graphene     | 0.5      | NR                | 11.1                | NR         | Buffer                  | 18         |
| CeO <sub>2</sub>                        | 1        | 0.001-0.05        | 0.48                | NR         | Buffer                  | S1         |
| CeO <sub>2</sub>                        | 0.6      | NR                | 21.13               | NR         | Buffer                  | S2         |
| CeO <sub>2</sub> /Au                    | 7        | 0.05-2.5          | 3.0                 | NR         | Buffer                  | S3         |
| Meso-CeO <sub>2</sub> /C                | ~10      | 0.1-5             | 0.198               | NR         | Buffer                  | This study |
| Glucose detection                       |          |                   |                     |            |                         |            |
| CeO <sub>2</sub> /platinum              | NR       | 1.39-8.33         | 0.5                 | 10 weeks   | Buffer                  | 16         |
| CeO <sub>2</sub>                        | 34.1     | 0.2-12.3          | 1.65                | NR         | Buffer                  | 17         |
| CeO <sub>2</sub> /platinum/graphene     | 1.3      | NR                | 66.2                | NR         | Buffer                  | 18         |
| CeO <sub>2</sub>                        | 12       | 2.78-22.2         | 0.05                | 12 weeks   | Buffer                  | S4         |
| Meso-CeO <sub>2</sub> /C                | 100      | 0.25-5            | 0.05                | 2 months   | Buffer & clinical serum | This study |

NR = not reported.

## References

- S1. A. Mehta, S. Patel, H. Bang, H. J. Cho and S. Seal, *Sens. Actuat. A. Chem.*, 2007, **134**, 146-151.
- S2. S. K. Ujjain, A. Das, G. Srivastava, P. Ahuja, M. Roy, A. Arya, K. Bhargava, N. Sethy, S. K. Singh, R. K. Sharma and M. Das, *Biointerphases*, 2014, **9**, 031011.
- S3. W. Zhang, G. Xie, S. Li, L. Lu and B. Liu, *Appl. Surf. Sci.*, 2012, **258**, 8222-8227.
- S4. A. A. Ansari, P. R. Solanki and B. D. Malhotra, *Appl. Phys. Lett.*, 2008, **92**, 263901-263903.
